# Supplementary material for: Smartphone-Based Maternal Education for the Complementary Feeding of Undernourished Children Under 3 Years of Age in Food-Secure Communities: Randomised Controlled Trial in Urmia, Iran
Source: MDPI journal article supplement (doi:10.3390/nu12020587), 2020-02-24
Supplement: s1 [file s1]

**Smartphone-based maternal education directed at complementary feeding versus treatment as usual among malnourished children below 3 years of age in food-secure contexts: Randomized controlled trial in Urmia, Iran**

**Supplement file A. Study questionnaire.**

**STUDY QUESTIONNAIRE**  
**NUTRITIONAL HEALTH LITERACY SURVEY INSTRUMENT**

**SECTION 1- SOCIO- DEMOGRAPHICS**

1- Mother birth date: 13 --- / --- / ---

2- Highest level of education:

- Elementary school       Middle school       Diploma       Academic

3- Mother occupation:

- House wife       Employed at home       Employed out of home

4- Parents house ownership status:

- Own home       Leased home

5- Car ownership status:

- Has       Has not

6- Number of the rooms:

- Less than 2       2 or 3       More than three

7- Residency:

- Village       City margin       City

8- Age of the children sequentially:

1. -----      2. -----      3. -----

9- Malnourished child birth date: 13--- / --- / ---

10- Number of the children: -----

11- Child sex:

- Girl       Boy

**SECTION 2- QUESTIONS for MOTHERS KNOWLEDGE**

|    | <b>Questions</b>                                                                                 | <b>Yes</b> | <b>No</b> |
|----|--------------------------------------------------------------------------------------------------|------------|-----------|
| 1  | <b>Breast milk is more easily digested than formula</b>                                          |            |           |
| 2  | <b>Breastfeeding does not affect in decreasing post-pregnancy body weight</b>                    |            |           |
| 3  | <b>Breastfeeding is helpful in achieving mother's pre-pregnancy womb size faster</b>             |            |           |
| 4  | <b>Mother milk and formula milk health benefits are the same</b>                                 |            |           |
| 5  | <b>Mother milk has all the essential nutrients for Newborn babies</b>                            |            |           |
| 6  | <b>Colostrum does not contain all the essential antibodies to help the child's immune system</b> |            |           |
| 7  | <b>The best time to start breastfeeding is within one hour of delivery</b>                       |            |           |
| 8  | <b>Exclusive breastfeeding to infants in the first 6 month of life is essential</b>              |            |           |
| 9  | <b>The water used to quench the child's thirst in less than 6 month of age, should be boiled</b> |            |           |
| 10 | <b>The child under the age of six months, needs breastfeeding every three hours</b>              |            |           |
| 11 | <b>Breastfeeding to child under 6 month of age is done when the child is crying</b>              |            |           |
| 12 | <b>Breastfeeding promote mother- baby bonding</b>                                                |            |           |
| 13 | <b>Mother who practiced breastfeeding has a low risk of getting breast cancer</b>                |            |           |
| 14 | <b>Not all mothers can have sufficient and nutrient milk</b>                                     |            |           |
| 15 | <b>Breastfeeding should not be continued despite the nipple scarring</b>                         |            |           |
| 16 | <b>Mothers do not eat enough, could not produce enough milk</b>                                  |            |           |

|    |                                                                                                                |  |  |
|----|----------------------------------------------------------------------------------------------------------------|--|--|
| 17 | Only children aged 3 to 9 months should receive iron supplementation                                           |  |  |
| 18 | The use of iron drop causes blackening of the teeth in infants                                                 |  |  |
| 19 | Lentils and beans provide needed iron for infants                                                              |  |  |
| 20 | At 9-11 months, if your baby does not use breast milk, should give him 1 to 2 additional meals a day           |  |  |
| 21 | In the first six months of life, the most nutritional needs of the infant are provided from supplementary food |  |  |
| 22 | From 1 to 2 years old, breastfeeding should be limited to the child                                            |  |  |
| 23 | From 1 to 2 years old, the child should have three to four food meals a day                                    |  |  |
| 24 | From 1 to 2 years old, a variety of sweet drinks can also be used for the baby                                 |  |  |
| 25 | From the age of 2 to 3, four meals a day should be given to the baby.                                          |  |  |
| 26 | From the age of 2 to 3, a snack should be given twice a day between the main meals                             |  |  |
| 27 | Canned food can be used to prepare baby food.                                                                  |  |  |
| 28 | It is necessary to refrain from giving honey to the infant                                                     |  |  |
| 29 | Avoid giving cow milk until the age of three.                                                                  |  |  |
| 30 | It is better to use non-pasteurized dairy products (such as yogurt and cheese) to feed the baby.               |  |  |

### SECTION 3- QUESTIONS for MOTHERS ATTITUDE

|  | Questions | Strongly Agree | Agree | Neutral | Disagree | Strongly Disagree |
|--|-----------|----------------|-------|---------|----------|-------------------|
|--|-----------|----------------|-------|---------|----------|-------------------|

|    |                                                                                                |  |  |  |  |  |
|----|------------------------------------------------------------------------------------------------|--|--|--|--|--|
| 1  | <b>Benefits of breastfeeding are limited for a specific period.</b>                            |  |  |  |  |  |
| 2  | <b>Bottles are the best option for feeding children with formula milk.</b>                     |  |  |  |  |  |
| 3  | <b>Mothers with smaller breast size cannot produce enough milk</b>                             |  |  |  |  |  |
| 4  | <b>Formula-fed babies are more likely to gain weight quickly than breast-fed infants.</b>      |  |  |  |  |  |
| 5  | <b>Formula-fed babies are healthier than formula-fed infants.</b>                              |  |  |  |  |  |
| 6  | <b>Breast milk is the ideal food for babies in the first 6 month of life.</b>                  |  |  |  |  |  |
| 7  | <b>Breastfeeding is more acceptable than formula feeding.</b>                                  |  |  |  |  |  |
| 8  | <b>Breastfeeding can strengthen the correlation between mother and infant.</b>                 |  |  |  |  |  |
| 9  | <b>If the mother intends to come back her work, formula feeding is better choice.</b>          |  |  |  |  |  |
| 10 | <b>Mothers who formula-fed their children will lose their mother-child bonding experiences</b> |  |  |  |  |  |
| 11 | <b>Mothers who breastfeed babies, fathers will feel isolated.</b>                              |  |  |  |  |  |
| 12 | <b>If there is enough meat in the diet, use of iron supplementation is not important</b>       |  |  |  |  |  |
| 13 | <b>A 6-12 month old baby can use pasteurized milk</b>                                          |  |  |  |  |  |
| 14 | <b>By starting other food meals, child doesn't need breastfeeding any more.</b>                |  |  |  |  |  |
| 15 | <b>The child should only use solid food after teeth has started developing.</b>                |  |  |  |  |  |

|    |                                                                                   |  |  |  |  |  |
|----|-----------------------------------------------------------------------------------|--|--|--|--|--|
| 16 | homemade foods are better than Packaged foods                                     |  |  |  |  |  |
| 16 | Packaged foods are nutritious than homemade foods                                 |  |  |  |  |  |
| 17 | Infants should eat from meals prepared for the household only at scheduled times. |  |  |  |  |  |
| 18 | It is not requisite to wash hands before feeding a child.                         |  |  |  |  |  |

### SECTION 4- QUESTIONS for MOTHERS PRACTICE

#### Relating to cares for 3 to 5 days until the end of six months

1- Is the infant repeatedly breastfed at least 8 times a day, according to his demand?

Yes       No

2- If he does not wake up, you will wake him up after three hours?

Yes       No

3- Do you breastfeed the infant at nights?

Yes       No

4- Does breastfeeding continue until complete breast discharge and abandonment by the infant?

Yes       No

5- Do you give your baby a pacifier?

Yes      No

6- Do you give any food or fluid other than breast milk to the infant?

Yes      No

---

 **Relating to cares for the end of 6 months until the end of 8 months** 

---

7- Do you prepare your baby food at a suitable density?

Yes      No

8- Have thickened nymphs and perfectly softened foods that fit the age and nutrient status of child containing a variety of food groups (especially animal protein sources such as meat (sheep and chicken) , fruits and vegetables rich in vitamin A and vitamin C) given to your child?

Yes      No

9- Do you also give fluids?

Yes      No

---

10- When did you stop breastfeeding / or will you? -----month of age

11- Have you started the supplementary food?

Yes, please continue the questions

No, please refer to question 24

12- When did you introduce a supplement to your child?

13- When did you introduce your child to the following table?

| Food item                 | Child Age |             |          |                 |              |                |
|---------------------------|-----------|-------------|----------|-----------------|--------------|----------------|
|                           | < 3 month | 3- 5 months | 6 months | 6 months-1 year | After 1 year | Not introduced |
| Cereals (Rice, bread...)  |           |             |          |                 |              |                |
| sweet potatoes and nymphs |           |             |          |                 |              |                |
| Fruits                    |           |             |          |                 |              |                |
| Vegetables                |           |             |          |                 |              |                |
| Eggs                      |           |             |          |                 |              |                |
| Fish/ Meat                |           |             |          |                 |              |                |
| Skimmed/ low fat milk     |           |             |          |                 |              |                |
| Cow milk                  |           |             |          |                 |              |                |
| Tea, sweets, chocolates   |           |             |          |                 |              |                |

**14- How often do you feed your child?**

- I. 6 to 8 months :      A) < 2 times    B) 2 to 3 times    C) 3 to 5 times    D) >5 times  
 II. 9 to 12 months :    A) <3 times      B) 3 to 4 times    C) 4 to 6 times    D) >6 times  
 III. > 12 months :      A) <3 times      B) 3 to 4 times    C) 4 to 6 times    D) >6 times

**15- Which food group you gave your child the day or the last night (please mark)?**

| Food                                            |                          |
|-------------------------------------------------|--------------------------|
| Rice, bread, pasta, maize, Soft and watery feed | <input type="checkbox"/> |
| sweet potatoes and nymphs                       | <input type="checkbox"/> |
| Banana, oranges, mango, pineapple, water-melon  | <input type="checkbox"/> |
| Tomato, onion, green pepper                     | <input type="checkbox"/> |
| Fish, meat, birds meat                          | <input type="checkbox"/> |
| Milk, cheese, yogurt, eggs                      | <input type="checkbox"/> |
| Cerelac, or other ready foods                   | <input type="checkbox"/> |



|                             |                          |
|-----------------------------|--------------------------|
| Breast milk                 | <input type="checkbox"/> |
| Fruit juice, flavored water | <input type="checkbox"/> |
| Tea, coffee                 | <input type="checkbox"/> |

**16- Do you add salt to your baby's food?      Yes No**

**17- By which of the following do you feed your baby?**

**A) Feeding bottle B) Bowl and spoon C) hand feeding**

**18- Do you wash your hands before feeding your child?      Yes No**

**19- Do you wash and sterilize baby food containers after use?      Yes No**

**20- How do you feed the sick child when has lost appetite?**

**A) slowly and patiently      B) By favorite foods      C) Forcefully**

**21- Why haven't introduced complementary feeding?**

**A) The child does not have the necessary age**

**B) Breast milk alone is enough**

**C) Insufficient fund      D) Other items.....**
